# Supplementary material for: Comparison between the Flapless Surgical Approach and a Novel Single Incision Access in Terms of Recovery Time and Comfort after Extraction of Impacted Inferior Third Molars: A Randomised, Blinded, Split-Mouth Controlled Clinical Trial
Source: MDPI journal article supplement (doi:10.3390/jcm12051995), 2023-03-02
Supplement: s1 [file s1]

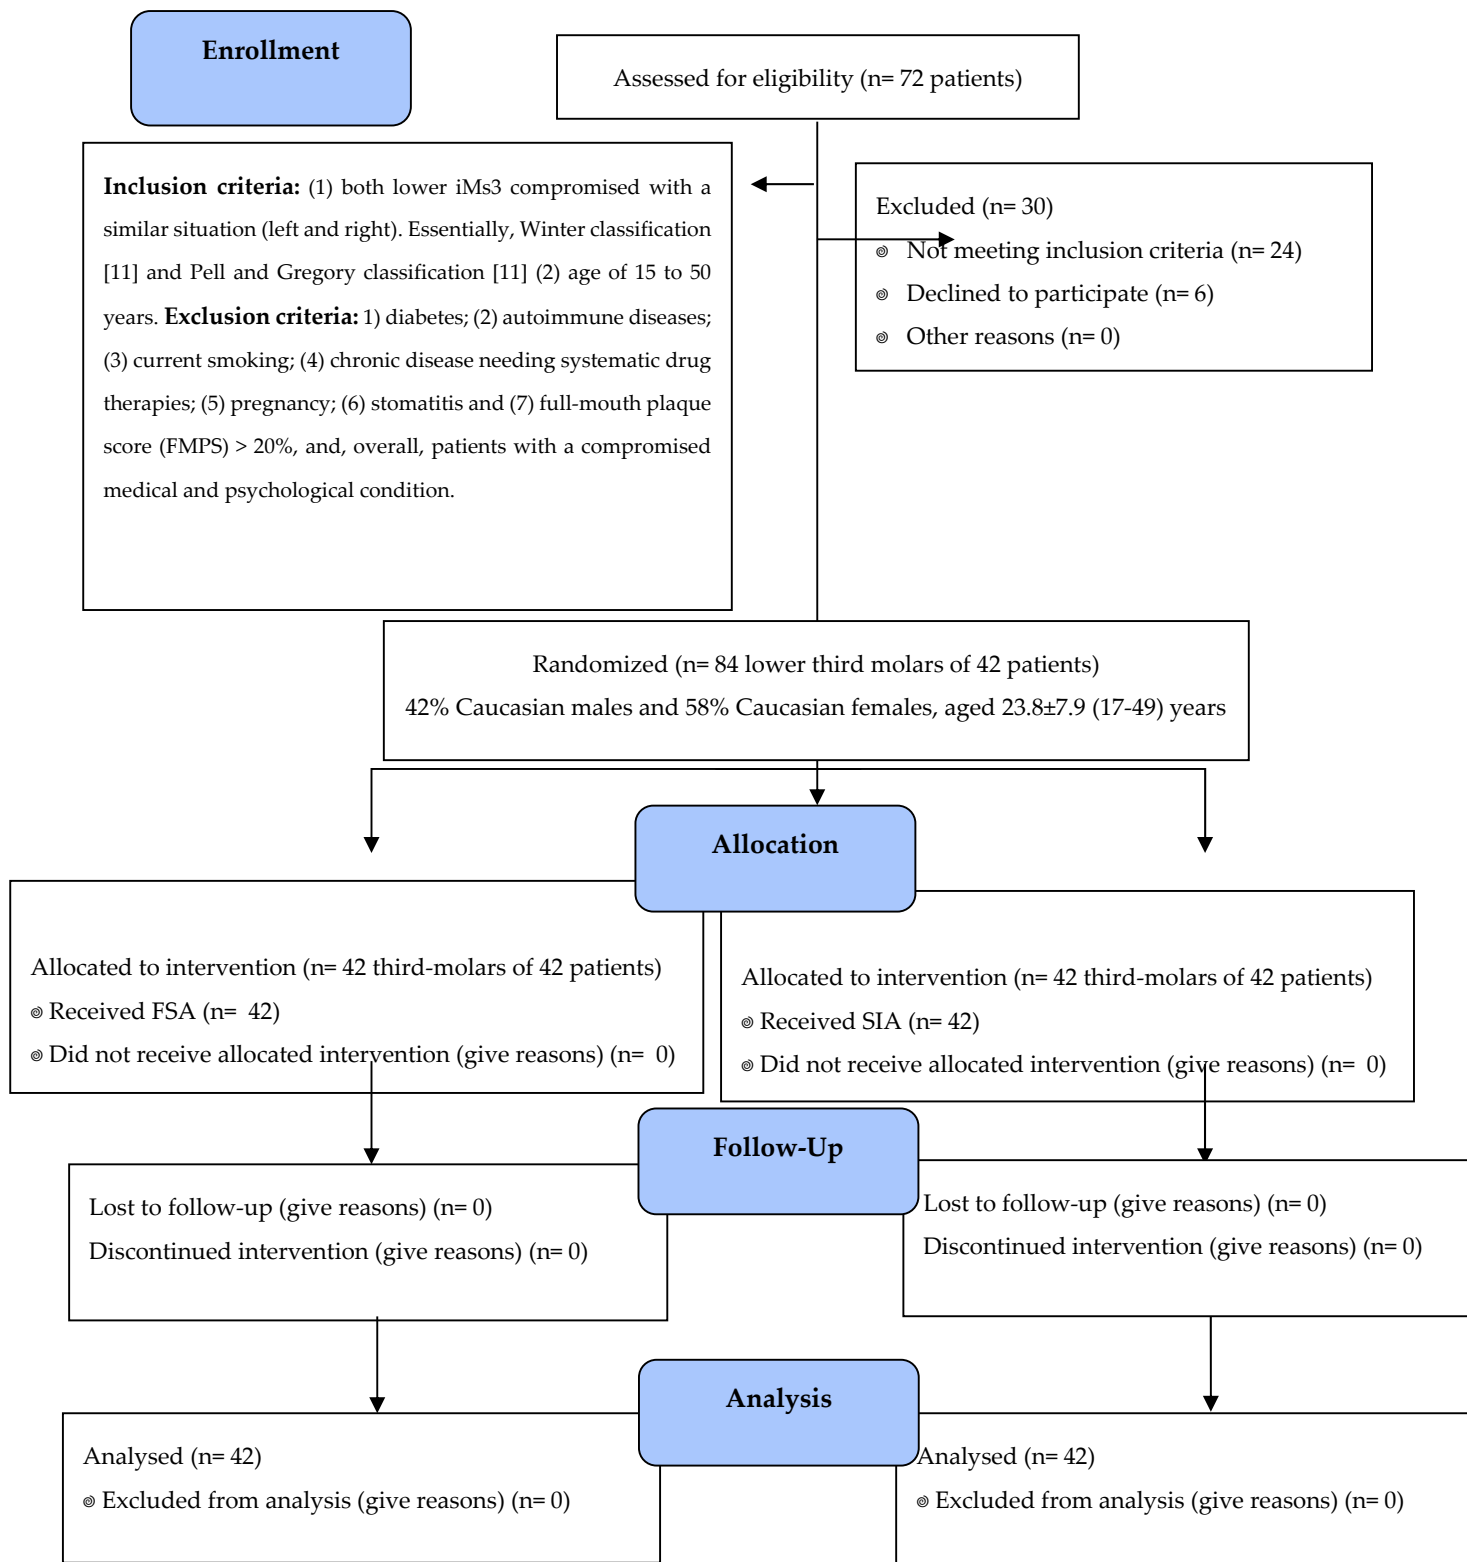

**Figure S1.** CONSORT experimental flow chart. FSA= flapless surgical approach; SIA= single incision access
